# Supplementary material
Source: publisher figshare collection journal article supplement (https://rs.figshare.com/ndownloader/files/13304153)
Supplement: Supplementary file 1 [file 13304153]

**Supplementary Material C**

**Appendix C.**

In this Appendix, we derive the critical applied pressure for the long-term response of a poro-hyperelastic cylindrical shell for which the parameter . Only limit-point instability will be considered and thus the formulation of the problem is radially symmetric. Since the fluid pressure in the long-term becomes equal to the applied pressure, , the given problem is equivalent to the problem for an ordinary hyperelastic shell, without fluid, which is traction free on the surface and loaded by tensile stress on the surface

, . (C.1)

The effective stress now becomes equal to the total stress. This equivalent problem will be studied here.

Recall the equilibrium equation (3.11)

. [3.11]

The difference between the stresses can be found according to (3.12)

. [3.12]

Consequently, using and differentiating with respect to instead of , we obtain from (3.11)

, (C.2)

where

. (C.3)

Note that is the only stabilizing term in the equilibrium equation (C.2). If , then and it follows that the radial stress is a constant. Then, because of zero traction boundary conditions at , the applied stress at must also be zero and the behavior of the shell is thus unstable. On the other hand, if , then . Thus, given zero traction boundary conditions at , the applied stress at could be an arbitrarily large positive number and the behavior will be stable.

Hence, to judge the stability of the system, it is sufficient to obtain an asymptotic estimate of for large values of the stretch . First, we represent as

, (C.4)

where denotes the terms that contain powers of order smaller than and is a second constant to be found. Then, it follows that

, . (C.5)

We assume that

. (C.6)

Now we substitute the derivative into the equilibrium equation (3.16) for the specific case where and obtain

(C.7)

Now we represent the products of the two stretches as

and collect in (C.7) the terms with the highest power order of to obtain

. (C.8)

By equating powers of in the last relationship, we obtain a linear equation with respect to

,

the solution of which is given by

. (C.9)

The constant can now be found from (C.8) by solving the equation

.

Therefore,

. (C.10)

Hence

as . (C.11)

We can now obtain the asymptotic estimate for . From (C.3)

. (C.12)

But

. (C.13)

After integration of (C.13) and taking into account zero traction boundary condition at , we obtain

. (C.14)

Therefore, the stress at the surface can be found as

. (C.15)

In the original problem for the poro-hyperelastic shell, at the radial stress and thus the applied pressure becomes

. (C.16)

This is the maximum pressure that can be applied to the poro-hyperelastic shell with if we take into account only the radially symmetric mode of stability loss. This result in fact does not depend on the value of the fluid pressure and remains valid as long as the fluid pressure is uniform across the thickness of the shell (including zero fluid pressure).
